# Supplementary material for: Mechanical Genomic Studies Reveal the Role of d-Alanine Metabolism in Pseudomonas aeruginosa Cell Stiffness
Source: PubMed Central journal article supplement (PMC6134093; doi:10.1128/mbio.01340-18), 2018-09-11

**Fig. S6.** *dadA*::Tn has lower Young's modulus when the growth media is supplemented with D-Ala or D-Ala-D-Ala

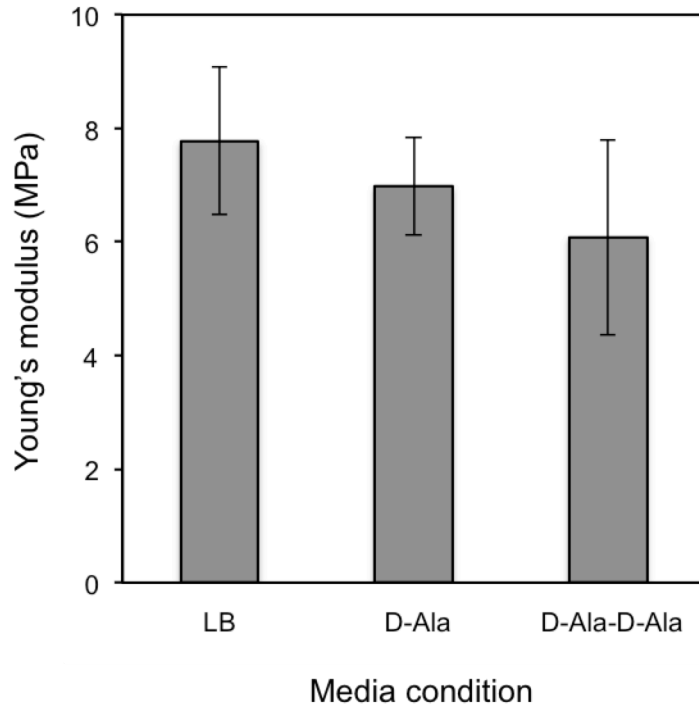

Supplement: mbo004184041sf6.pdf [file mbo004184041sf6.pdf]
