# Supplementary material for: Mechanical Genomic Studies Reveal the Role of d-Alanine Metabolism in Pseudomonas aeruginosa Cell Stiffness
Source: PubMed Central journal article supplement (PMC6134093; doi:10.1128/mbio.01340-18), 2018-09-11

**Fig. S8.** GRABS score for *P. aeruginosa* wild type cells, *dadA::Tn* cells,  $\Delta dadA$ , and  $\Delta dadAX$  strains

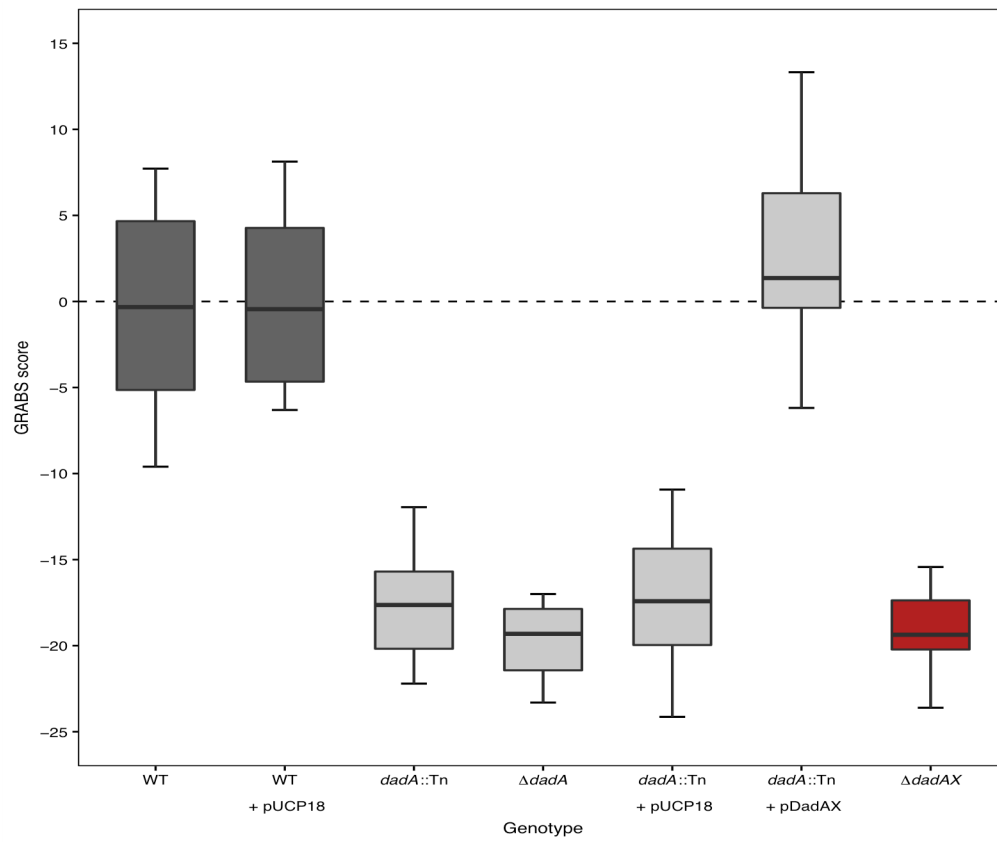

Supplement: mbo004184041sf8.pdf [file mbo004184041sf8.pdf]
